# Supplementary material for: Discriminant Analysis PCA-LDA Assisted Surface-Enhanced Raman Spectroscopy for Direct Identification of Malaria-Infected Red Blood Cells
Source: MDPI journal article supplement (doi:10.3390/mps5030049), 2022-06-10
Supplement: s1 [file s1]

Prediction of unknown sample

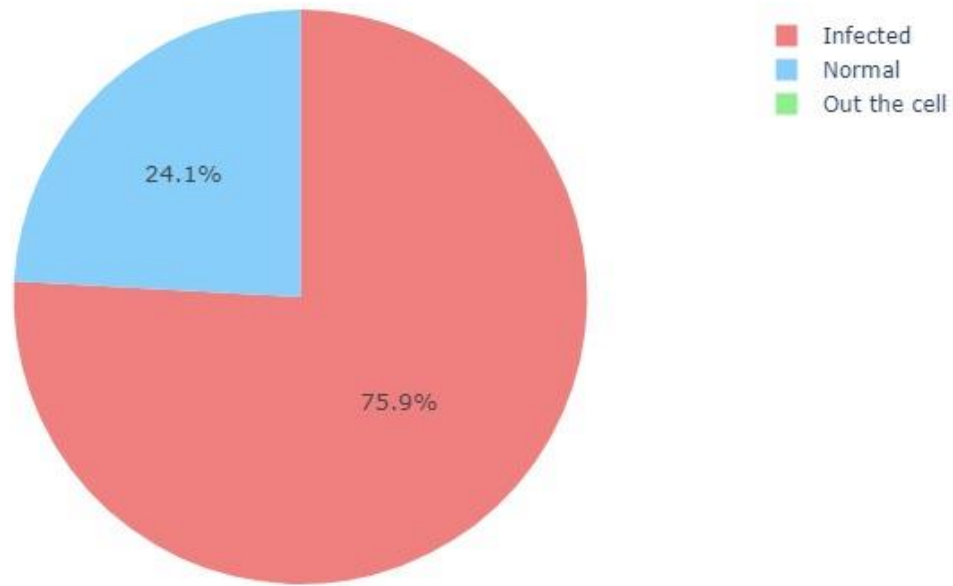

Blind test sample No.1  
(The example of the prediction pie chart  
in the manuscript)

Prediction of unknown sample

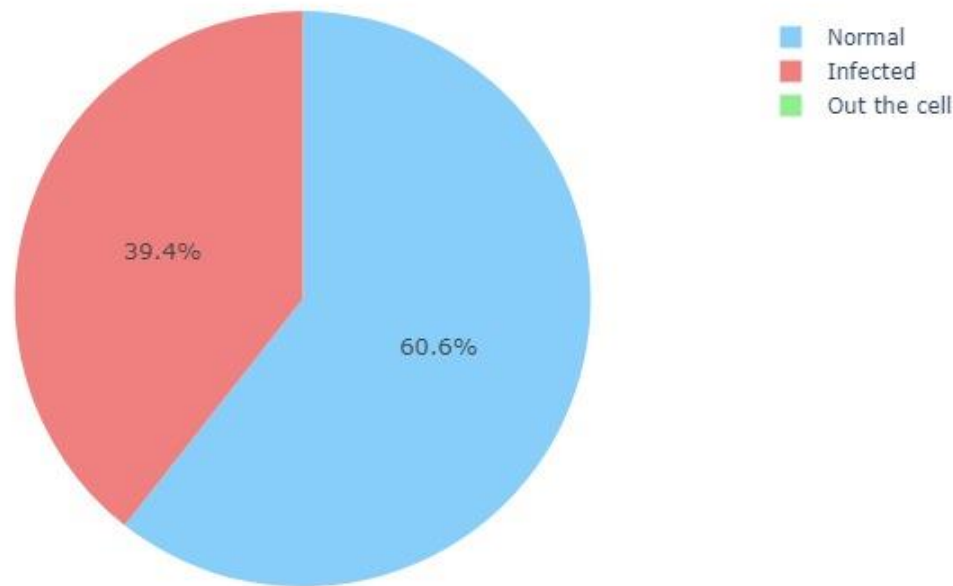

Blind test sample No.2

Prediction of unknown sample

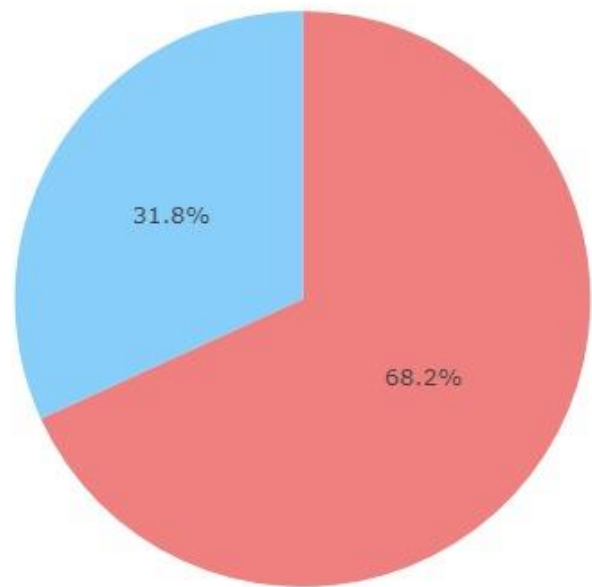

Blind test sample No.3

- Infected
- Normal
- Out the cell

Prediction of unknown sample

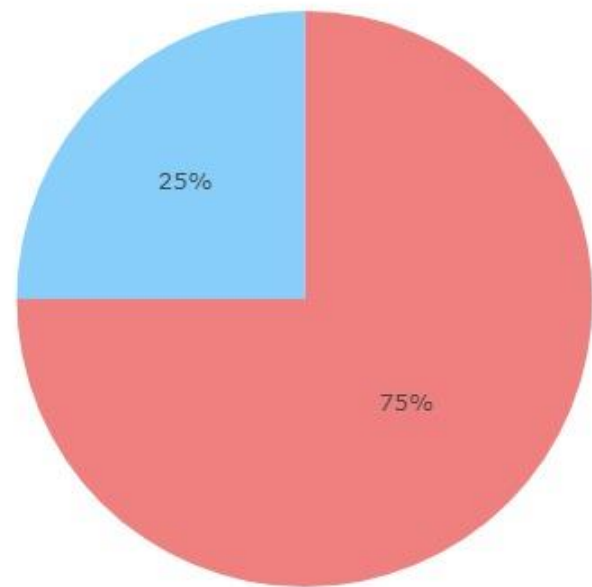

Blind test sample No.4

- Infected
- Normal
- Out the cell

Prediction of unknown sample

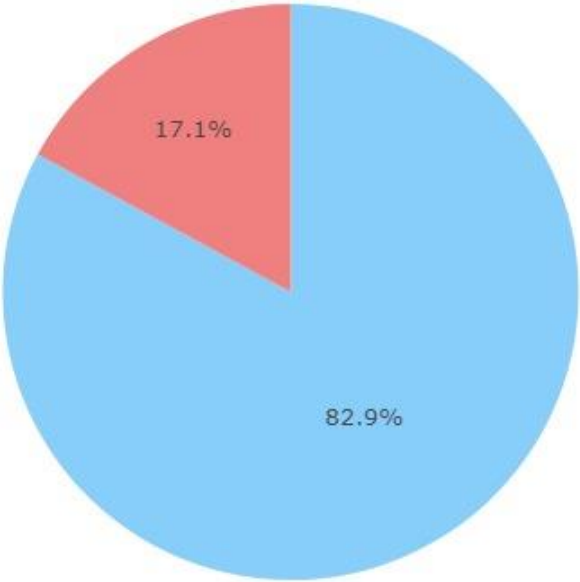

Blind test sample No.5

- Normal
- Infected
- Out the cell

Prediction of unknown sample

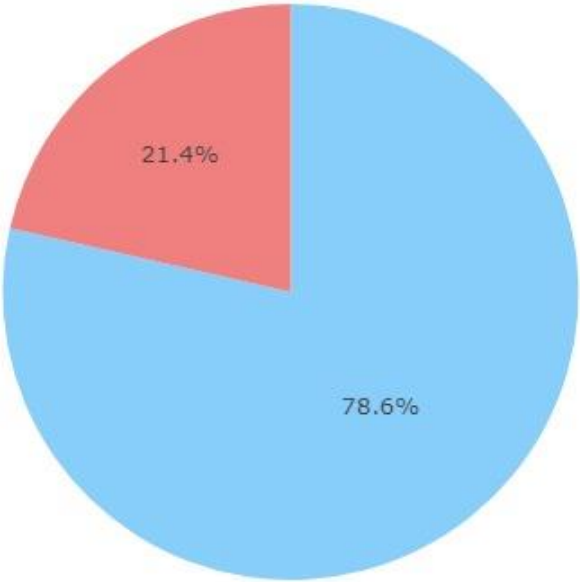

Blind test sample No.6

- Normal
- Infected
- Out the cell

Prediction of unknown sample

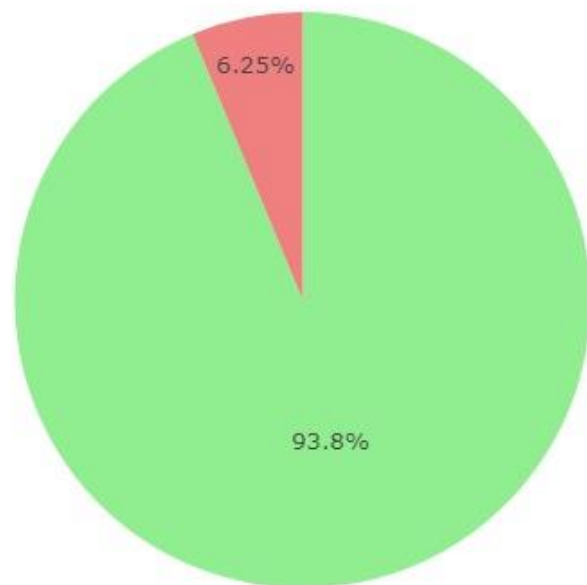

Blind test sample No.7

Prediction of unknown sample

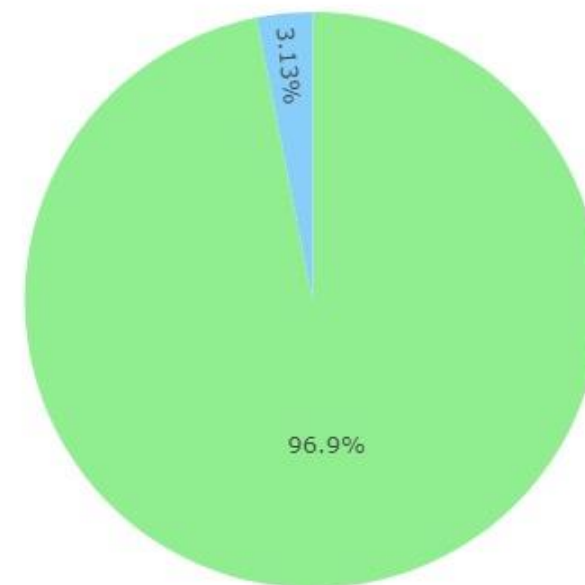

Blind test sample No.8

**Figure S1.** pie charts of the blind data sets, Supplement for Figure 10.
